# Target selection for the SUNS and DEBRIS surveys for debris discs in the solar neighbourhood

N. M. Phillips,<sup>1\*</sup> J. S. Greaves,<sup>2</sup> W. R. F. Dent,<sup>3</sup> B. C. Matthews,<sup>4</sup> W. S. Holland,<sup>3</sup> M. C. Wyatt<sup>5</sup> and B. Sibthorpe<sup>3</sup>

<sup>1</sup>*Institute for Astronomy (IfA), Royal Observatory Edinburgh, Blackford Hill, Edinburgh EH9 3HJ*

<sup>2</sup>*School of Physics and Astronomy, University of St Andrews, North Haugh, St Andrews, Fife KY16 9SS*

<sup>3</sup>*UK Astronomy Technology Centre (UKATC), Royal Observatory Edinburgh, Blackford Hill, Edinburgh EH9 3HJ*

<sup>4</sup>*Herzberg Institute of Astrophysics (HIA), National Research Council of Canada, Victoria, BC, Canada*

<sup>5</sup>*Institute of Astronomy (IoA), University of Cambridge, Madingley Road, Cambridge CB3 0HA*

Accepted 2009 August 28. Received 2009 July 27; in original form 2009 March 31

## ABSTRACT

Debris discs – analogous to the asteroid and Kuiper–Edgeworth belts in the Solar system – have so far mostly been identified and studied in thermal emission shortward of 100  $\mu\text{m}$ . The *Herschel* space observatory and the Submillimetre Common-User Bolometer Array-2 (SCUBA-2) camera on the James Clerk Maxwell Telescope will allow efficient photometric surveying at 70 to 850  $\mu\text{m}$ , which allows for the detection of cooler discs not yet discovered, and the measurement of disc masses and temperatures when combined with shorter wavelength photometry. The SCUBA-2 Unbiased Nearby Stars survey (SUNS) and the Disc Emission via a Bias-free Reconnaissance in the Infrared/Submillimetre (DEBRIS) *Herschel* Open Time Key Project are complementary legacy surveys observing samples of  $\sim 500$  nearby stellar systems. To maximize the legacy value of these surveys, great care has gone into the target selection process. This paper describes the target selection process and presents the target lists of these two surveys.

**Key words:** surveys – circumstellar matter – stars: distances – stars: statistics – solar neighbourhood.

## 1 INTRODUCTION

The solar neighbourhood is an ideal testing ground for the study of debris discs and planetary systems. Proximity maximizes dust mass sensitivity and can allow systems to be spatially resolved. Systems near the Sun span a wide range of stellar parameters, for example mass, age, metallicity and multiplicity. Whilst determining these parameters may not be easy, the diversity included in volume-limited samples makes them ideal for legacy surveys where one may wish to investigate trends as a function of many system parameters.

This paper presents five all-sky volume-limited samples of nearby stellar systems with main-sequence primaries of spectral types A, F, G, K, M. These form the basis of the target lists of two complementary surveys for debris discs using the Submillimetre Common-User Bolometer Array-2 (SCUBA-2, Holland et al. 2003; Audley et al. 2004) camera on the James Clerk Maxwell Telescope (JCMT) and the *Herschel* space observatory (Pilbratt 2008).

The SCUBA-2 Unbiased Nearby Stars survey (SUNS, Matthews et al. 2007) is a large flux-limited survey of 500 systems at 850  $\mu\text{m}$ .

The target flux rms is 0.7 mJy beam<sup>-1</sup>, equal to the extragalactic confusion limit of the JCMT at 850  $\mu\text{m}$ . Shallow 450  $\mu\text{m}$  images of varying depth will be obtained simultaneously, and deep images at 450  $\mu\text{m}$  will be proposed to follow up 850  $\mu\text{m}$  detections.

The Disc Emission via a Bias-free Reconnaissance in the Infrared/Submillimetre (DEBRIS) *Herschel* Open Time Key Program will image 446 systems (356 in common with SUNS) at 110 and 170  $\mu\text{m}$  using the Photodetector Array Camera and Spectrometer (PACS, Poglitsch et al. 2008) instrument, with follow-up of around 100 systems at 250, 350 and 500  $\mu\text{m}$  using the Spectral and Photometric Imaging Receiver (SPIRE, Griffin et al. 2008) instrument. This survey is primarily driven by the 110  $\mu\text{m}$  band, which has the highest dust mass sensitivity for cold discs such as the Kuiper–Edgeworth belt of our Solar system. The intended flux rms at 110  $\mu\text{m}$  is 1.2 mJy beam<sup>-1</sup>, which is twice the predicted extragalactic confusion limit. 170  $\mu\text{m}$  images are taken simultaneously with a predicted rms of 1.7 mJy beam<sup>-1</sup>, equal to the predicted extragalactic confusion limit in this band.

The primary goals of these surveys are statistical: in general, how do debris disc properties vary with stellar mass, age, metallicity, system morphology (multiplicity, component masses, separations), presence of planets, etc. To be able to answer so many

\*E-mail: nmp@roe.ac.uk

questions and to minimize the risk of unforeseen selection effects, large samples and simple, clearly defined target selection criteria are required. Volume-limited samples satisfy these requirements and, as well as maximizing the proximity of the targets, the stars nearest to the Sun are very widely studied. For example, nearby stars are the main targets of radial velocity, astrometry and direct imaging planet searches. The majority of SUNS and DEBRIS targets also have photometry at 24 and 70  $\mu\text{m}$  from the Multiband Imaging Photometer and Spectrometer (MIPS) instrument on the *Spitzer* space telescope, which ceased operation at the end of 2009 March. This large spectral coverage from 24 to 850  $\mu\text{m}$  for over 300 systems will be an incredible resource for detailed spectral energy distribution modelling of systems with debris discs.

Given that we are considering the closest systems to the Sun, substantial effort was required to compile the samples presented here. Late M-type stars within 10 pc are still being discovered (e.g. Henry et al. 2006), and complete homogeneous data sets covering the spectral type and distance ranges we consider do not exist. We have tried to make our sample selection using the most complete and accurate data available at the time of the DEBRIS proposal submission in 2007 October.

## 2 SELECTION CRITERIA

Our systems all have primaries (defined here as the component with the brightest visible magnitude) which we believe are main-sequence (i.e. hydrogen burning) stars. The sample is split into five volume-limited subsamples based on spectral type: A, F, G, K and M. In the rest of this paper, we use the term ‘X-type system’ to mean ‘system with X-type primary’. Using separate subsamples is necessary due to the steep nature of the stellar mass function, which for example means that a single volume-limited sample would contain over 100 times as many M-type systems as A-type systems. The choice of using spectral types to split the sample, rather than stellar mass, is purely practical as, with the exception of certain binary systems, stellar masses cannot be directly determined observationally. Using spectral types does, however, have the effect that the subsamples cover quite different ranges in logarithmic mass space.

The early type, upper mass, limit of A0 is chosen as stars of earlier type are too rare in the solar neighbourhood to build a suitably large sample. A conservative late-type limit of M7.0 was chosen to avoid the inclusion of any brown dwarfs, and also to improve the completeness of the M-type sample. M-type stars span the largest log  $M$  range of any of our spectral classes, so making a cut at M7.0 will not restrict the statistical usefulness of the sample.

We do not discriminate against multiple star systems, and they are included naturally within the volume limits. We consider common proper motion stars (with compatible parallax where available) as members of the same system, with no specific limit on the binary separation. We have not gone so far as to consider stars with common space motion but large ( $\gg 1^\circ$ ) angular separation as systems. This definition of system membership was primarily chosen for convenience of target selection, but fits well with the statistical goals of these surveys. With the exception of stars in moving groups, each system can be considered to represent a different point in age and composition. The fact that several interesting objects [e.g. with known infrared (IR) excess or planets] are considered here as secondaries does not affect the statistical usefulness of the sample, although it has the disadvantage that such objects may not be observed by these surveys (see below).

The number of systems in each subsample was determined by the selection criteria for SUNS, which required 100 systems in each

subsample in the declination range  $-40^\circ < \delta < +80^\circ$ . Hence, the all-sky samples presented here contain roughly 123  $[100 \times 2/(\sin 80^\circ + \sin 40^\circ)]$  systems each. The SUNS sample sizes were chosen to allow detection rates for various subsets e.g. planet hosts to be distinguished (see Matthews et al. 2007).

The DEBRIS target list comprises the nearest systems presented here (all-sky), subject to a cut in the predicted 110  $\mu\text{m}$  cirrus confusion level towards each system. The confusion prediction was taken from the Herschel Confusion Noise Estimator, which is part of the Herschel Observation Planning Tool (HSPOT). Systems with total predicted confusion for point-source detections greater than  $1.2 \text{ mJy beam}^{-1}$ , corresponding to twice the predicted extragalactic confusion limit, were rejected. To maximize the number of systems observed, DEBRIS will not image secondary components in systems where they will not fit in the PACS point-source field of view (FoV) ( $150 \times 50$  arcsec with unconstrained orientation) with the primary. This will affect between 20 and 49 systems depending on the actual field orientations.

The SUNS target list is simply the nearest 100 systems in each subsample here which have  $-40^\circ < \delta < +80^\circ$  (with this sample, it does not make any difference whether the cut is made in B1950 or J2000/ICRS equinox declination, but J2000/ICRS should be assumed). The large ( $\sim 600 \times 600$  arcsec) FoV of SCUBA-2 means that a maximum of 13 systems will have components not observed with the primary star.

Initially, it had been proposed to only include systems with primaries of spectroscopic luminosity classes V and IV–V. This criterion was retained for G, K and M classes, but was relaxed for A- and F-type stars, where there is not a simple relationship between luminosity class and evolutionary stage (e.g. Gray, Napier & Winkler 2001a; Gray, Graham & Hoyt 2001b). Candidates for the A and F samples (and other candidates without accurately known luminosity classes) were evaluated using their position on a Johnson  $B, V$  absolute colour–magnitude diagram. Figs 1 and 2 show such diagrams for the final sample overlaid with solar composition isochrones and zero-age main sequences (ZAMS) for metallicities

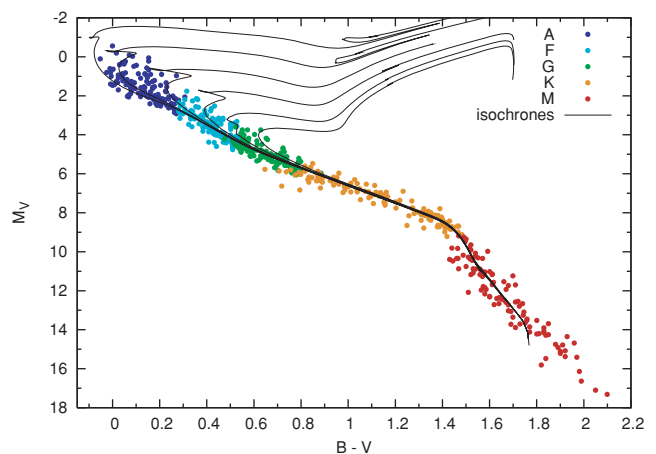

**Figure 1.** Johnson  $B, V$  absolute colour–magnitude diagram for system primaries. Overlaid are  $[\text{Fe}/\text{H}] = 0.0, [\alpha/\text{Fe}] = 0.0$  isochrones from the Dartmouth Stellar Evolution Database (Dotter et al. 2008) with ages of 0.25, 0.5, 1, 2, 4 and 8 Gyr (with turn-offs going from left to right). The photometry is mostly converted from Tycho photometry (Tycho-2 or TDSC) using transformations for unreddened main-sequence stars. For most M-type targets, Johnson  $B, V$  photometry from various sources was used (see text). Note that primaries in some close binaries are not individually resolved in this photometry.

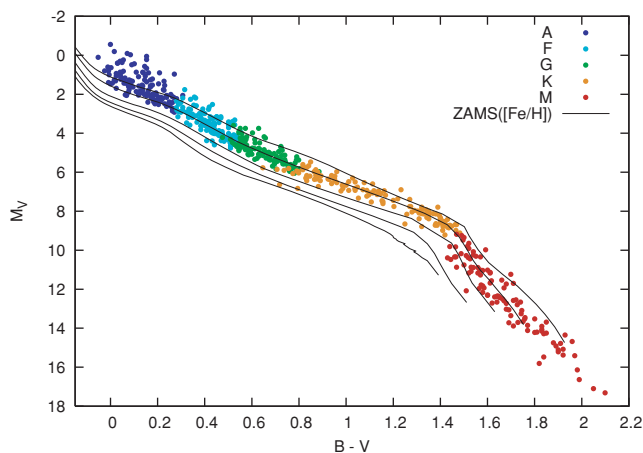

**Figure 2.** Johnson  $B, V$  absolute colour–magnitude diagram for system primaries as in Fig. 1. Overlaid with ZAMS for stars from  $0.2 M_{\odot}$  upwards with  $[\text{Fe}/\text{H}] = +0.5, 0.0, -0.5, -1.0, -2.0$  (from top to bottom). The ZAMS curves are produced from  $[\alpha/\text{Fe}] = 0.0, Y = 0.245 + 1.6Z$  evolutionary tracks from the Dartmouth Stellar Evolution Database (Dotter et al. 2008), with values taken at 2 per cent of the total lifetime of the stars.

from  $+0.5$  to  $-2.0$ . A certain amount of leeway had to be allowed for unknown metallicity, and uncertainties in photometry (e.g. unresolved secondaries in close binaries) and parallax.

### 3 SOURCES OF DATA

#### 3.1 Parallaxes

*Hipparcos*-based parallaxes were taken from ‘*Hipparcos*, the New Reduction of the Raw Data’ (HIPnr, van Leeuwen 2007) and several papers which applied special analysis to multiple systems [the General Notes issued with the original *Hipparcos* catalogue (HIPgn, Perryman et al. 1997); Falin & Mignard 1999; Söderhjelm 1999; Fabricius & Makarov 2000]. Parallaxes from HIPnr were used unless one of the other resources had a lower uncertainty. In cases where more than one of the other resources provided a parallax for the same *Hipparcos* system, we have taken the parallax from the first resource in the order: Fabricius & Makarov (2000), Söderhjelm (1999), Falin & Mignard (1999), HIPgn. *Hipparcos* parallaxes from multiple resources for the same *Hipparcos* system were not averaged in any way to avoid underestimating the uncertainty in the averaged values, as they have all been reduced from the same data.

The other large parallax resource used was the fourth edition of the Yale General Catalog of Trigonometric Parallaxes [GCTP or Yale Parallax Catalogue (YPC); van Altena et al. 1995], which contains approximately 2300 systems not measured by *Hipparcos* due to the magnitude limit of  $V \sim 12$  and the targeted nature of the *Hipparcos* astrometry mission.

In addition, for many M dwarfs, parallaxes from several smaller papers were used (e.g. Hershey & Taff 1998; Ducourant et al. 1998; Benedict et al. 1999; Weis et al. 1999; Costa et al. 2005; Jao et al. 2005; Henry et al. 2006), as well as some unpublished values from the RECONS consortium (Henry, private communication).

Where reliable parallaxes from multiple independent sources, or separate parallaxes for individual components in a system, are available, we take an uncertainty weighted average:

$$\pi_{\text{adopted}} = \frac{\sum_i \pi_i / \sigma_i^2}{\sum_i 1 / \sigma_i^2} \quad \text{and} \quad \sigma_{\text{adopted}} = \sqrt{\frac{1}{\sum_i 1 / \sigma_i^2}}.$$

Two or more parallaxes were used for 81 per cent of systems and three or more were used for 7 per cent of systems. These cases are mostly due to overlap with *Hipparcos*- and ground-based (e.g. YPC) parallaxes.

#### 3.2 Spectral types

For A–K-type stars, we have used spectral types from Gray et al. (2003, 2006) where they were available. Gray et al. have been obtaining spectra and determining spectral types and stellar parameters ( $T_{\text{eff}}$ ,  $[M/\text{H}]$ ,  $\log g$ ) for stars considered to be within 25 pc and of spectral type earlier than M0 or with no spectral type in the *Hipparcos* catalogue (Perryman et al. 1997). For stars without published Gray et al. types, we have used types from the Michigan Catalogue of HD stars (Houk et al. 1975, 1978, 1982, 1988, 1999), which includes all HD stars south of  $\delta_{\text{B1900}} = +05^\circ$ . If types from neither Gray et al. nor Houk et al. were available, we have fallen back on types in compilations such as the fifth revised edition of the Bright Star Catalogue (BSC5, Hoffleit & Warren 1991) or the second edition of the Catalog of Components of Double & Multiple stars (CCDM, Dommanget & Nys 2002). These fall-back types are not considered to be accurate, and were largely ignored in the selection process in favour of photometry.

For  $\sim$ K5 and later stars, we have generally used spectral types from the Palomar/MSU Nearby-Star Spectroscopic Survey (PMSU, Reid, Hawley & Gizis 1995; Hawley, Gizis & Reid 1996), which provides spectral types for almost all late-type stars in the third Catalogue of Nearby stars (CNS3, Gliese & Jahreiss 1991). A large number of nearby M dwarfs also have measured spectral types in the system or Kirkpatrick, Henry & McCarthy (1991); however, we have chosen to use PMSU types wherever possible for homogeneity. The difference between PMSU and Kirkpatrick et al. types is rarely more than one subtype. For newly discovered nearby M dwarfs not included in the PMSU, types in the Kirkpatrick et al. system (e.g. from Henry et al. 2006) have been adopted.

#### 3.3 Photometry

Whilst distance and spectral type are our primary selection parameters, it was necessary to use photometry both for determining luminosity and when determining spectral class where only low accuracy spectral types were available. As distinguishing between dwarfs and giants for K/M-type stars is very simple and because we had accurate spectral types for almost all candidates later than K5 (see above), photometry was only needed for the selection of systems on the G/K boundary and earlier. All of these candidates are bright enough to have sufficiently accurate photometry in the Tycho-2 catalogue (Høg et al. 2000), the Tycho Double Star Catalogue (TDSC, Fabricius et al. 2002) or the Tycho catalogue (Høg et al. 1997). Where there has been a need to convert between Tycho and Johnson photometry, we have used the relationships in Høg et al. (2000).

#### 3.4 Astrometry

Accurate positions and proper motions were necessary both for matching entries in the various catalogues used and for finding common proper motion companions. Where possible, astrometry from Salim & Gould (2003), Gould & Chanamé (2004), Deacon, Hambly & Cooke (2005), Subasavage et al. (2005a,b), Finch et al. (2007), Henry et al. (2006) and Jao et al. (2005) has been used. For stars not included or not resolved in these, we have used astrometry from the TDSC; Tycho-2; the Tycho Reference Catalogue

(TRC, Høg et al. 1998); Tycho; Bakos, Sahu & Németh (2002), the Positions and Proper Motions catalogue (PPM, Röser et al. 1991, 1993; Röser, Bastian & Kuzmin 1994) or the CCDM (in order of decreasing preference).

#### 4 COMPONENTS OF MULTIPLE SYSTEMS

We have undertaken several steps to maximize the accuracy of the selection of components in multiple systems.

Using the database we have constructed for the purposes of the target selection, we have searched for stars with common proper motion to candidate targets. This not only yielded secondary stars which we had not previously identified but also showed some candidates to be secondaries of other stars. In cases where common proper motion companions have independent parallax measurements, these have been checked to be compatible. Other common proper motion companions have been identified from literature, although a systematic literature search for such companions has not been performed.

We have performed a complete check of all components listed in the CCDM as being in the CCDM systems of our targets. In many cases, components listed in the CCDM are not physically associated (e.g. do not have common proper motion) with the target system. Many CCDM components have cross-identifications with other catalogues, so determining whether they have common proper motion is straightforward. For those without cross-identifications, or without accurate astrometry in other catalogues, only the astrometry in the CCDM could be used.

The process for determining system membership of CCDM components consisted of an automated search for components using the 2MASS Point Source Catalogue (Cutri et al. 2003), and the Tycho/Tycho-2 catalogues, followed by manual inspection of 2MASS and Schmidt survey images, as well as comparison with the Washington Double Star catalogue (Mason et al. 2009) in many cases. CCDM components found not to be comoving with the target systems, or not identified at all, are not included in the sample presented here.

#### 5 SAMPLE PROPERTIES

Overall properties of the subsamples are presented in Table 1, including the numbers of systems containing stars with detected planets and debris discs. Figs 3 and 4 show the distribution of systems on the sky.

**Table 1.** Summary of subsample properties.

| Subsample | $d_{\max}$<br>(pc) | $N_{\text{tot}}$ | $\rho$<br>(pc $^{-3}$ ) | Med( $T_{\text{eff}}$ )<br>(K) | $\sigma_{T_{\text{eff}}}$<br>(K) | $N_{\text{planet}}$ | $N_{\text{debris}}$ | $N_{\text{SUNS}}$ | $N_{\text{DEBRIS}}$ |
|-----------|--------------------|------------------|-------------------------|--------------------------------|----------------------------------|---------------------|---------------------|-------------------|---------------------|
| A         | 45.5               | 130              | $0.0014 \pm 0.0001$     | 8133                           | 748                              | 2                   | 24                  | 100               | 83                  |
| F         | 24.1               | 130              | $0.0093 \pm 0.0008$     | 6360                           | 343                              | 6                   | 21                  | 100               | 94                  |
| G         | 21.3               | 125              | $0.0129 \pm 0.0012$     | 5628                           | 249                              | 13                  | 10                  | 100               | 89                  |
| K         | 15.6               | 127              | $0.0335 \pm 0.0030$     | 4461                           | 499                              | 5                   | 5                   | 100               | 91                  |
| M         | 8.58               | 117              | $0.1855 \pm 0.0171$     | 3175                           | 288                              | 5                   | 1                   | 100               | 89                  |
| Total     |                    | 629              |                         |                                |                                  | 31                  | 61                  | 500               | 446                 |

*Note.*  $d_{\max}$  and  $N_{\text{tot}}$  are the maximum distance and number of stars in each subsample.  $\rho$  is the volume number density of systems,  $\rho = N_{\text{tot}}/d_{\max}^3 \pm \rho/\sqrt{N_{\text{tot}}}$ . Med( $T_{\text{eff}}$ ) is the median  $T_{\text{eff}}$ , and  $\sigma_{T_{\text{eff}}}$  is the standard deviation of  $T_{\text{eff}}$  within each subsample.  $N_{\text{planet}}$  is the number of systems where one or more stars are listed as planet hosts in the exoplanet.eu database (2009 July 27).  $N_{\text{debris}}$  is the number of systems containing a currently detected debris disc (or other indistinguishable IR excess) as indicated by any of Rhee et al. (2007), Beichman et al. (2006), Su et al. (2006), Trilling et al. (2007).  $N_{\text{SUNS}}$  and  $N_{\text{DEBRIS}}$  are the numbers of systems from this paper included in the SUNS and DEBRIS surveys, respectively.

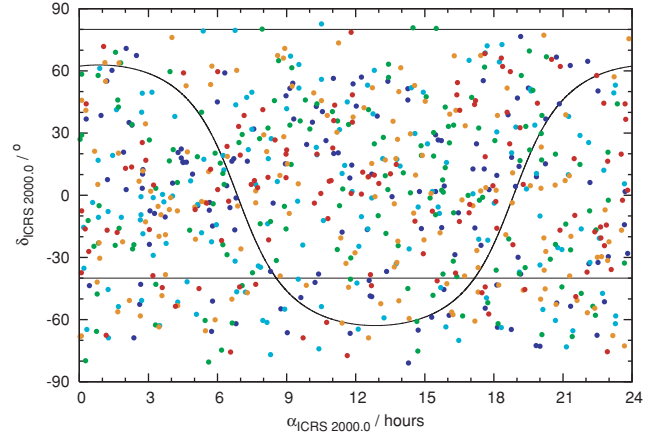

**Figure 3.** Distribution of all systems in ICRS equatorial coordinates. The SUNS declination limits of  $+80^\circ$  and  $-40^\circ$ , and the Galactic plane are shown.

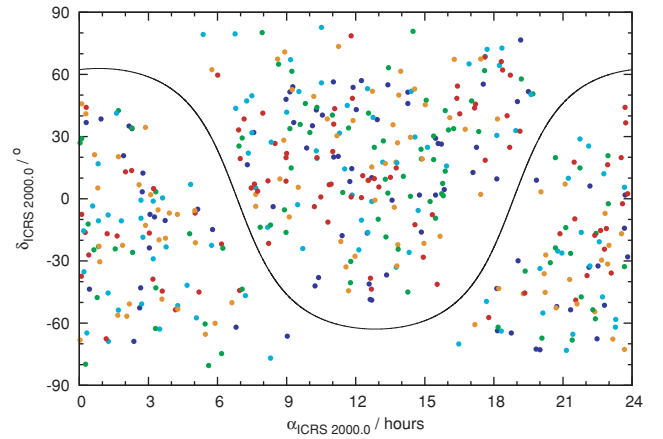

**Figure 4.** Distribution in ICRS equatorial coordinates of the 446 systems in the DEBRIS survey. The cut in predicted cirrus confusion means that there are few systems near the Galactic plane.

#### 5.1 Completeness

In Fig. 5, we show the number of systems as a function of distance for each of our subsamples. The F, G and K subsamples very closely follow a cubic law, indicating that we are justified to assume that they are isotropically and homogeneously distributed in the



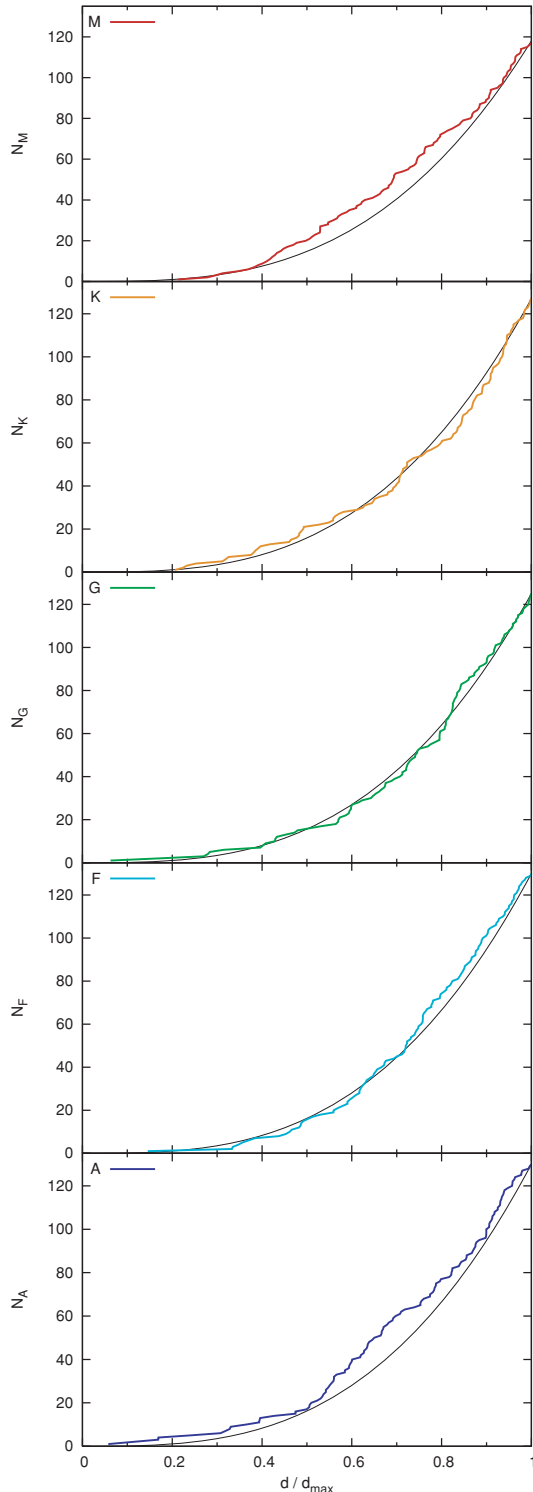

**Figure 5.** Number of included systems in each subsample as a function of distance ( $d_{\max} = 8.58, 15.6, 21.3, 24.1, 45.5$  pc for M, K, G, F, A). For comparison, the line  $N = N(d_{\max})(\frac{d}{d_{\max}})^3$  is shown. Note that the F, G, K subsamples fit well indicating no completeness trend with distance. The M subsample is likely incomplete beyond  $\sim 6$  pc.

relevant volumes and that we have no selection effects as a function of distance. For the M subsample, there is almost certainly incompleteness at distances beyond  $\sim 6$  pc (see e.g. Henry, Kirkpatrick & Simons 1994) which will mostly affect the latest-type stars. The

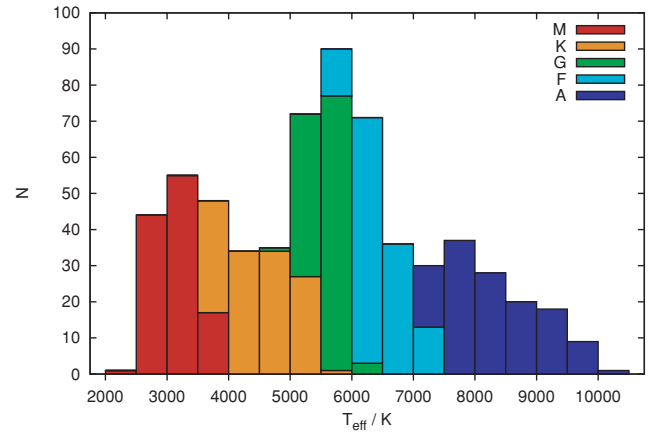

**Figure 6.** Histogram of number of primaries in 500 K  $T_{\text{eff}}$  bins. Contributions from each spectral type subsample are shown in colour. For A–K stars,  $T_{\text{eff}}$  was derived from  $(B_T - V_T)$  [or  $(B_J - V_J)$  in a few cases where Tycho photometry was not available] using a polynomial fit against  $T_{\text{eff}}$  values from Gray et al. (2003, 2006) (see Fig. 7).  $(B_T - V_T)$  was used in preference to the more accurate temperature indicator  $(V - K_s)$ , as components are resolved at very small separations in Tycho-2/TDSC photometry. For M-type stars,  $T_{\text{eff}}$  was derived from our adopted spectral type using  $T_{\text{eff}}$  values from Reid & Hawley (2005).

deviation of the A subsample from the cubic law is likely a combination of a slight lack of systems towards the Galactic poles at the largest distances, and correlation between system positions due to the young age of A stars.

## 5.2 Temperature distribution

As our sample was split into subsamples based on spectral class, we expected to have a good coverage of effective temperature of primary stars from about 2500 to 10 000 K (M7–A0 types). Fig. 6 shows the distribution of  $T_{\text{eff}}$  for primary stars in our sample in 500 K bins. The colours in the plot indicate the contributions from

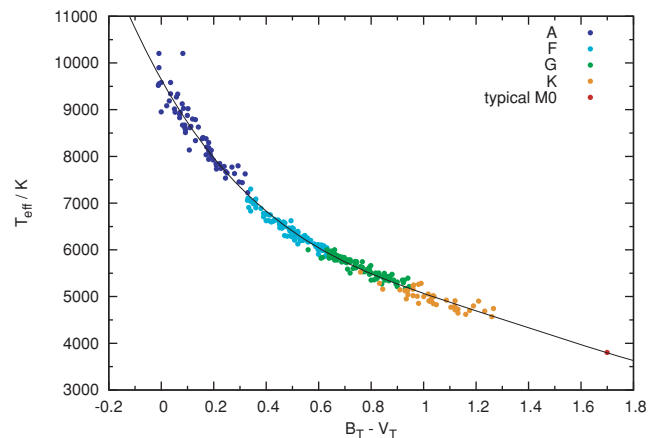

**Figure 7.** Gray et al. (2003, 2006)  $T_{\text{eff}}$  versus  $(B_T - V_T)$  for primary stars in our sample, with fourth-order polynomial fit. This fit was used to generate  $T_{\text{eff}}$  values for all A–K primaries for Fig. 6. A point for a typical M0-type star at (1.70, 3800) was added to the fit to make it tie in with  $T_{\text{eff}}$  values for M-type stars derived from spectral types using relationships in Reid & Hawley (2005).

the five A–M subsamples. For A–K stars,  $T_{\text{eff}}$  was computed from  $(B_T - V_T)$  using a fit to  $T_{\text{eff}}$  for stars in our sample from Gray et al. (2003, 2006).  $(B_T - V_T)$  was chosen as opposed to other photometric colours such as  $(B_J - V_J)$  or  $(V_T - K_s)$ , as accurate homogeneous  $B_T$  and  $V_T$  photometry that is resolved down to separations of  $<0.5$  arcsec is available for almost all of our A–K primaries from the Tycho-2 and Tycho Double Star (TDSC) catalogues. The fit of  $(B_T - V_T)$  to Gray et al.'s  $T_{\text{eff}}$  values is shown in Fig. 7. A fourth-order least-squares polynomial fit was obtained:

$$T_{\text{eff}}/K = (9646.15 \pm 37.6) \\ - (10018.4 \pm 354.4)(B_T - V_T) \\ + (9056.19 \pm 963.2)(B_T - V_T)^2 \\ - (4424.10 \pm 950.5)(B_T - V_T)^3 \\ + (807.378 \pm 302.8)(B_T - V_T)^4.$$

This agrees well with the fit of Ramírez & Meléndez (2005) with  $[\text{Fe}/\text{H}] = 0.0$  for their range of validity of  $0.344 < (B_T - V_T) < 1.715$ . Our rms of residuals is 150.7 K for 302 stars, which is higher than that of Ramírez & Meléndez (2005) (104 K for 378 stars), as we cover a larger temperature range, have not used  $[\text{Fe}/\text{H}]$  as a fit parameter, and have not accounted for interstellar reddening (although this should be almost negligible for our nearby star sample).

For M-type stars, we determined  $T_{\text{eff}}$  simply from our adopted spectral type using values from Reid & Hawley (2005). The above photometric fit for A–K stars included a point representative of a typical M0-type star at  $(B_T - V_T) = 1.70$ ,  $T_{\text{eff}} = 3800$  K to make the fit consistent with our M star temperatures at the K/M boundary.

The peak in the  $T_{\text{eff}}$  distribution at about 5700 K is due to the G and F spectral types covering a narrow range in  $T_{\text{eff}}$ . Indeed, in retrospect, there would be justification for treating F and G types as a single spectral-type sample.

**Table 2.** Reference abbreviations used in the text and tables.

| Abbreviation | CDS catalogue(s)                   | Reference                                                                   |
|--------------|------------------------------------|-----------------------------------------------------------------------------|
| 2MASS        | II/246                             | 2MASS Point Source Catalogue (Cutri et al. 2003)                            |
| BSC5         | V/50                               | Bright Star Catalogue, 5th Revised Edition (Hoffleit & Warren 1991)         |
| CCDM         | I/274                              | Catalogue of Components of Double & Multiple stars (Dommanget & Nys 2002)   |
| CNS3         | V/70A                              | Catalogue of Nearby Stars, Preliminary 3rd Version (Gliese & Jahreiss 1991) |
| HIP          | I/239                              | <i>Hipparcos</i> Main Catalogue (Perryman et al. 1997)                      |
| HIPgn        | I/239                              | <i>Hipparcos</i> General Notes (Perryman et al. 1997)                       |
| HIPnr        | I/311*                             | <i>Hipparcos</i> , the New Reduction of the Raw Data (van Leeuwen 2007)     |
| LHS          | I/279                              | Revised Luyten Half-Second catalogue (Bakos et al. 2002)                    |
| NLTT         | J/ApJ/582/1011                     | Revised NLTT Catalog (Salim & Gould 2003)                                   |
| PPM          | I/{146, 193, 206, 208}             | Positions and Proper Motions catalogue (Röser et al. 1991, 1993, 1994)      |
| RECX         |                                    | RECONS unpublished parallaxes (Henry, private communication)                |
| SCR          | J/AJ/{129/413, 130/1658, 133/2898} | SuperCOSMOS-RECONS (Subasavage et al. 2005a,b; Finch et al. 2007)           |
| TDSC         | I/276                              | Tycho Double Star Catalogue (Fabricius et al. 2002)                         |
| TRC          | I/250                              | Tycho Reference Catalogue (Høg et al. 1998)                                 |
| TYC          | I/239                              | Tycho catalogue (Høg et al. 1997)                                           |
| TYC2         | I/259                              | Tycho-2 catalogue (Høg et al. 2000)                                         |
| YPC          | I/238A                             | Yale Parallax Catalogue, 4th ed. (van Altena et al. 1995)                   |
| WDS          | B/wds                              | Washington Visual Double Star Catalog (Mason et al. 2009)                   |
| ben99        |                                    | Benedict et al. (1999)                                                      |
| bes90        |                                    | Bessel (1990)                                                               |
| cos05        |                                    | Costa et al. (2005)                                                         |
| dea05        | J/A+A/435/363                      | Southern Infrared Proper Motion Survey (SIPS, Deacon et al. 2005)           |
| duc98        |                                    | Ducourant et al. (1998)                                                     |
| egg74        |                                    | Eggen (1974)                                                                |
| egg79        |                                    | Eggen (1979)                                                                |
| egg80        |                                    | Eggen (1980)                                                                |
| fab00        | J/A+AS/144/45                      | Fabricius & Makarov (2000)                                                  |
| fal99        | J/A+AS/135/231                     | Falin & Mignard (1999)                                                      |
| gou04        | J/ApJS/150/455                     | Gould & Chanamé (2004)                                                      |
| gray03       | J/AJ/126/2048                      | Gray et al. (2003)                                                          |
| gray06       | J/AJ/132/161                       | Gray et al. (2006)                                                          |
| jao05        |                                    | Jao et al. (2005)                                                           |
| hen06        |                                    | Henry et al. (2006)                                                         |
| haw95        | III/198                            | Palomar/MSU survey (North) (Reid et al. 1995)                               |
| haw96        | III/198                            | Palomar/MSU survey (South) (Hawley et al. 1996)                             |
| houk         | III/{31B, 51B, 80, 133, 214}       | Michigan Catalogue of HD stars (Houk et al. 1975, 1978, 1982, 1988, 1999)   |
| her98        |                                    | Hershey & Taff (1998)                                                       |
| leg92        |                                    | Legget (1992)                                                               |
| rod74        |                                    | Rodgers & Eggen (1974)                                                      |
| sod99        | J/A+A/341/121                      | Söderhjelm (1999)                                                           |
| wei91        |                                    | Weis (1991)                                                                 |
| wei96        |                                    | Weis (1996)                                                                 |
| wei99        |                                    | Weis et al. (1999)                                                          |

*Note:* CDS is Centre de Données astronomiques de Strasbourg. For HIPnr we have used the data on the CDROM published with the book, as it had not been added to the CDS at the time.

**Table 3.** System information: system ID, primary star name, adopted distance and uncertainty ( $d = 1/\pi \pm \sigma_\pi/\pi^2$ ), number of parallax measures used, parallax references (see Table 2), predicted total confusion noise for point source observed with *Herschel*'s PACS instrument at 110  $\mu\text{m}$ , which surveys system is included in (S: SUNS, D: DEBRIS). Note that distance uncertainty is not shown for the two systems with unpublished RECONS parallaxes. The distance for UNS G001 ( $\alpha$  + Proxima Centauri) does not include any contribution from Proxima, as the parallax difference from the primary is significant. This example table contains the first 10 systems in each sample; the full table is available in the electronic version of the article (see Supporting Information).

| UNS ID | Primary           | $d$<br>(pc)        | $N_\pi$ | References          | $C_{\text{PACS},110}$<br>(mJy beam $^{-1}$ ) | Surveys |
|--------|-------------------|--------------------|---------|---------------------|----------------------------------------------|---------|
| M001   | HIP 87937         | $1.833 \pm 0.001$  | 3       | YPC,HIPnr,ben99     | 1.29                                         | S       |
| M002   | GJ 406            | $2.386 \pm 0.012$  | 1       | YPC                 | 0.53                                         | S D     |
| M003   | HD 95735          | $2.543 \pm 0.004$  | 2       | HIPnr,YPC           | 0.52                                         | S D     |
| M004   | GJ 65 A           | $2.676 \pm 0.019$  | 1       | YPC                 | 0.52                                         | S D     |
| M005   | HIP 92403         | $2.965 \pm 0.017$  | 2       | HIPnr,YPC           | 6.07                                         | S       |
| M006   | GJ 905            | $3.165 \pm 0.011$  | 1       | YPC                 | 0.78                                         | S D     |
| M007   | HD 217987         | $3.278 \pm 0.007$  | 2       | YPC,HIPnr           | 0.52                                         | S D     |
| M008   | HIP 57548         | $3.354 \pm 0.015$  | 2       | YPC,HIPnr           | 0.53                                         | S D     |
| M009   | GJ 866 AB         | $3.454 \pm 0.052$  | 1       | YPC                 | 0.55                                         | S D     |
| M010   | HD 173739         | $3.524 \pm 0.018$  | 3       | HIPnr,YPC,HIPnr     | 0.54                                         | S D     |
| ...    |                   |                    |         |                     |                                              |         |
| K001   | HD 22049          | $3.216 \pm 0.002$  | 2       | HIPnr,YPC           | 0.53                                         | S       |
| K002   | HD 201091         | $3.495 \pm 0.006$  | 3       | HIPnr,HIPnr,YPC     | 4.12                                         | S       |
| K003   | HD 209100         | $3.622 \pm 0.004$  | 2       | HIPnr,YPC           | 0.52                                         | D       |
| K004   | HD 202560         | $3.946 \pm 0.012$  | 2       | HIPnr,YPC           | 0.55                                         | S D     |
| K005   | HD 88230          | $4.866 \pm 0.012$  | 2       | HIPnr,YPC           | 0.52                                         | S D     |
| K006   | HD 26965          | $4.984 \pm 0.006$  | 2       | HIPnr,YPC           | 0.70                                         | S D     |
| K007   | HD 165341         | $5.080 \pm 0.021$  | 2       | HIPnr,YPC           | 1.75                                         | S       |
| K008   | HD 131977         | $5.861 \pm 0.023$  | 3       | sod99,HIPnr,YPC     | 0.78                                         | S D     |
| K009   | HD 155886         | $5.949 \pm 0.014$  | 4       | YPC,HIPnr,YPC,HIPnr | 14.83                                        | S       |
| K010   | HD 191408         | $6.015 \pm 0.010$  | 2       | YPC,HIPnr           | 0.63                                         | S D     |
| ...    |                   |                    |         |                     |                                              |         |
| G001   | HD 128620         | $1.338 \pm 0.002$  | 2       | YPC,sod99           | 95.28                                        |         |
| G002   | HD 10700          | $3.650 \pm 0.002$  | 2       | HIPnr,YPC           | 0.52                                         | S       |
| G003   | HD 185144         | $5.754 \pm 0.006$  | 2       | HIPnr,YPC           | 1.53                                         | S       |
| G004   | HD 4614           | $5.943 \pm 0.016$  | 2       | HIPnr,YPC           | 2.60                                         | S       |
| G005   | HD 20794          | $6.043 \pm 0.007$  | 2       | HIPnr,YPC           | 0.52                                         | D       |
| G006   | HD 131156         | $6.708 \pm 0.021$  | 2       | HIPnr,YPC           | 0.53                                         | S D     |
| G007   | CCDM 12337+4121 A | $8.440 \pm 0.014$  | 2       | HIPnr,YPC           | 0.52                                         | S D     |
| G008   | HD 115617         | $8.555 \pm 0.016$  | 2       | HIPnr,YPC           | 0.62                                         | S D     |
| G009   | HD 39587          | $8.683 \pm 0.019$  | 2       | HIPnr,YPC           | 15.04                                        | S       |
| G010   | HD 114710         | $9.132 \pm 0.014$  | 2       | YPC,HIPnr           | 0.52                                         | S D     |
| ...    |                   |                    |         |                     |                                              |         |
| F001   | HD 61421          | $3.507 \pm 0.013$  | 2       | YPC,HIPnr           | 0.57                                         | S D     |
| F002   | HD 170153         | $8.032 \pm 0.033$  | 2       | YPC,sod99           | 0.56                                         | S D     |
| F003   | HD 30652          | $8.069 \pm 0.011$  | 2       | YPC,HIPnr           | 0.76                                         | S D     |
| F004   | HD 98231          | $8.368 \pm 0.055$  | 2       | YPC,sod99           | 0.52                                         | S D     |
| F005   | HD 1581           | $8.586 \pm 0.012$  | 2       | HIPnr,YPC           | 0.52                                         | D       |
| F006   | HD 38393          | $8.926 \pm 0.014$  | 2       | YPC,HIPnr           | 0.53                                         | S D     |
| F007   | HD 203608         | $9.261 \pm 0.016$  | 2       | YPC,HIPnr           | 0.53                                         | D       |
| F008   | HD 19373          | $10.542 \pm 0.026$ | 2       | YPC,HIPnr           | 8.04                                         | S       |
| F009   | HD 102870         | $10.928 \pm 0.026$ | 2       | YPC,HIPnr           | 0.52                                         | S D     |
| F010   | GJ 107 A          | $11.128 \pm 0.028$ | 2       | HIPnr,YPC           | 2.17                                         | S       |
| ...    |                   |                    |         |                     |                                              |         |
| A001   | HD 48915          | $2.631 \pm 0.009$  | 2       | HIPnr,YPC           | 6.21                                         | S       |
| A002   | HD 187642         | $5.125 \pm 0.014$  | 2       | YPC,HIPnr           | 1.24                                         | S D     |
| A003   | HD 172167         | $7.681 \pm 0.021$  | 2       | YPC,HIPnr           | 0.59                                         | S       |
| A004   | HD 216956         | $7.701 \pm 0.028$  | 2       | HIPnr,YPC           | 0.52                                         | S       |
| A005   | HD 102647         | $11.011 \pm 0.063$ | 2       | HIPnr,YPC           | 0.54                                         | S D     |
| A006   | HD 60179          | $14.005 \pm 0.408$ | 2       | HIPnr,YPC           | 0.54                                         | S D     |
| A007   | HD 76644          | $14.509 \pm 0.034$ | 2       | YPC,HIPnr           | 0.52                                         | S D     |
| A008   | HD 159561         | $14.941 \pm 0.230$ | 2       | YPC,HIPnr           | 1.26                                         | S       |
| A009   | HD 203280         | $15.038 \pm 0.025$ | 2       | HIPnr,YPC           | 7.42                                         | S       |
| A010   | HD 128898         | $16.568 \pm 0.038$ | 2       | HIPnr,YPC           | 6.41                                         |         |

## 6 CATALOGUE

Table 2 lists the reference abbreviations used throughout this paper and in the other tables. Tables 3–6 define the sample and give information used in the selection process. Each system is given an

identifier of the form XNNN where X is the spectral class (subsample) and NNN is a zero-padded running number increasing with distance in each subsample. These identifiers are referred to by the acronym UNS, standing for Unbiased Nearby Stars, as in the SUNS survey name.

**Table 4.** Component names, positions and proper motions. ‘Primary’ column contains ‘P’ for primary component; ‘References’ column gives the reference for position and proper motion;  $\rho$  column gives separation of component from primary if larger than 1.0 arcsec.  $\rho$  should be considered approximate, and time variable for smaller separations (of the order of 100 au or less). It is advised to check orbital solutions to find relative positions for a particular epoch. This example table contains the first six systems in each sample; the full table is available in the online version of the article (see Supporting Information).

| UNS ID | Primary | Name                   | Position ICRS 2000.0 |             | $\mu_{\alpha} \cos \delta$<br>(mas yr <sup>-1</sup> ) | $\mu_{\delta}$<br>(mas yr <sup>-1</sup> ) | References | $\rho$<br>(arcsec) |
|--------|---------|------------------------|----------------------|-------------|-------------------------------------------------------|-------------------------------------------|------------|--------------------|
| M001   | P       | HIP 87937              | 17 57 48.50          | +04 41 35.8 | -798.8                                                | 10277.3                                   | NLTT       |                    |
| M002   | P       | GJ 406                 | 10 56 28.99          | +07 00 52.0 | -3841.6                                               | -2725.1                                   | LHS        |                    |
| M003   | P       | HD 95735               | 11 03 20.20          | +35 58 11.6 | -577.0                                                | -4761.8                                   | NLTT       |                    |
| M004   | P       | GJ 65 A                | 01 39 01.54          | -17 57 01.8 | 3296.2                                                | 563.9                                     | NLTT       |                    |
| M004   |         | GJ 65 B                | 01 39 01.54          | -17 57 01.8 | 3296.2                                                | 563.9                                     | NLTT       |                    |
| M005   | P       | HIP 92403              | 18 49 49.37          | -23 50 10.4 | 644.2                                                 | -192.9                                    | NLTT       |                    |
| M006   | P       | GJ 905                 | 23 41 55.00          | +44 10 38.9 | 100.0                                                 | -1594.1                                   | NLTT       |                    |
|        |         | ...                    |                      |             |                                                       |                                           |            |                    |
| K001   | P       | HD 22049               | 03 32 55.84          | -09 27 29.7 | -976.1                                                | 18.1                                      | NLTT       |                    |
| K002   | P       | HD 201091              | 21 06 53.94          | +38 44 57.9 | 4155.1                                                | 3258.9                                    | NLTT       |                    |
| K002   |         | HD 201092              | 21 06 55.27          | +38 44 31.3 | 4117.1                                                | 3128.0                                    | NLTT       | 30.8               |
| K003   | P       | HD 209100              | 22 03 21.66          | -56 47 09.5 | 3959.1                                                | -2538.3                                   | NLTT       |                    |
| K003   |         | 2MASS 22041052-5646577 | 22 04 10.59          | -56 46 58.1 | 4157.4                                                | -2478.3                                   | dea05      | 402.2              |
| K004   | P       | HD 202560              | 21 17 15.27          | -38 52 02.5 | -3259.0                                               | -1147.0                                   | NLTT       |                    |
| K005   | P       | HD 88230               | 10 11 22.14          | +49 27 15.2 | -1359.8                                               | -505.7                                    | NLTT       |                    |
| K006   | P       | HD 26965               | 04 15 16.32          | -07 39 10.3 | -2239.3                                               | -3419.9                                   | NLTT       |                    |
| K006   |         | HD 26976               | 04 15 21.50          | -07 39 22.3 | -2239.3                                               | -3419.9                                   | NLTT       | 77.9               |
| K006   |         | GJ 166 C               | 04 15 21.50          | -07 39 22.3 | -2239.3                                               | -3419.9                                   | NLTT       | 77.9               |
|        |         | ...                    |                      |             |                                                       |                                           |            |                    |
| G001   | P       | HD 128620              | 14 39 36.50          | -60 50 02.3 | -3678.2                                               | 481.8                                     | NLTT       |                    |
| G001   |         | HD 128621              | 14 39 35.08          | -60 50 13.8 | -3600.4                                               | 952.1                                     | NLTT       | 15.4               |
| G001   |         | HIP 70890              | 14 29 43.02          | -62 40 46.7 | -3777.2                                               | 775.4                                     | jao05      | 7866.0             |
| G002   | P       | HD 10700               | 01 44 04.08          | -15 56 15.9 | -1721.8                                               | 854.1                                     | NLTT       |                    |
| G003   | P       | HD 185144              | 19 32 21.59          | +69 39 40.3 | 599.2                                                 | -1734.7                                   | NLTT       |                    |
| G004   | P       | HD 4614                | 00 49 06.29          | +57 48 54.7 | 1087.1                                                | -559.7                                    | NLTT       |                    |
| G004   |         | GJ 34 B                | 00 49 05.17          | +57 49 03.8 | 1104.7                                                | -493.2                                    | TDSC       | 12.8               |
| G005   | P       | HD 20794               | 03 19 55.65          | -43 04 11.2 | 3038.2                                                | 728.3                                     | NLTT       |                    |
| G006   | P       | HD 131156              | 14 51 23.39          | +19 06 01.7 | 165.0                                                 | -68.6                                     | TYC        |                    |
| G006   |         | GJ 566 B               | 14 51 23.05          | +19 06 06.8 | 89.7                                                  | -147.3                                    | TDSC       | 6.9                |
|        |         | ...                    |                      |             |                                                       |                                           |            |                    |
| F001   | P       | HD 61421               | 07 39 18.12          | +05 13 30.0 | -716.6                                                | -1034.6                                   | NLTT       |                    |
| F001   |         | GJ 280 B               | 07 39 18.12          | +05 13 30.0 | -716.6                                                | -1034.6                                   | NLTT       |                    |
| F002   | P       | HD 170153              | 18 21 03.38          | +72 43 58.2 | 531.1                                                 | -351.6                                    | NLTT       |                    |
| F003   | P       | HD 30652               | 04 49 50.41          | +06 57 40.6 | 462.9                                                 | 11.8                                      | NLTT       |                    |
| F004   | P       | HD 98231               | 11 18 10.90          | +31 31 44.9 | -453.7                                                | -591.4                                    | NLTT       |                    |
| F004   |         | HD 98230               | 11 18 10.95          | +31 31 45.7 | -453.7                                                | -591.4                                    | NLTT       |                    |
| F005   | P       | HD 1581                | 00 20 04.26          | -64 52 29.3 | 1708.4                                                | 1164.8                                    | NLTT       |                    |
| F006   | P       | HD 38393               | 05 44 27.79          | -22 26 54.2 | -292.4                                                | -368.5                                    | NLTT       |                    |
| F006   |         | HD 38392               | 05 44 26.54          | -22 25 18.6 | -304.4                                                | -352.2                                    | NLTT       | 97.1               |
|        |         | ...                    |                      |             |                                                       |                                           |            |                    |
| A001   | P       | HD 48915               | 06 45 08.92          | -16 42 58.0 | -546.0                                                | -1223.1                                   | NLTT       |                    |
| A001   |         | GJ 244 B               | 06 45 08.92          | -16 42 58.0 | -546.0                                                | -1223.1                                   | NLTT       |                    |
| A002   | P       | HD 187642              | 19 50 47.00          | +08 52 06.0 | 536.8                                                 | 385.5                                     | NLTT       |                    |
| A003   | P       | HD 172167              | 18 36 56.34          | +38 47 01.3 | 201.0                                                 | 287.5                                     | NLTT       |                    |
| A004   | P       | HD 216956              | 22 57 39.05          | -29 37 20.1 | 329.2                                                 | -164.2                                    | NLTT       |                    |
| A005   | P       | HD 102647              | 11 49 03.58          | +14 34 19.4 | -499.0                                                | -113.8                                    | NLTT       |                    |
| A006   | P       | HD 60179               | 07 34 35.86          | +31 53 17.8 | -206.3                                                | -148.2                                    | NLTT       |                    |
| A006   |         | HD 60178               | 07 34 36.10          | +31 53 18.6 | -206.3                                                | -148.2                                    | NLTT       | 3.1                |
| A006   |         | GJ 278 C               | 07 34 37.45          | +31 52 10.2 | -206.3                                                | -148.2                                    | NLTT       | 70.6               |
|        |         | ...                    |                      |             |                                                       |                                           |            |                    |



**Table 5.** A–K primary spectral types, Tycho photometry and effective temperatures: spectral type and reference; Tycho  $B_T$ ,  $V_T$  magnitudes with standard errors and reference;  $T_{\text{eff}}$  from Gray et al. (2003) or Gray et al. (2006);  $T_{\text{eff}}$  computed from Tycho photometry (see text). Where TYC2 and TDSC give the same  $B_T$ ,  $V_T$  and uncertainties we use TYC2 as the reference here. In six cases Tycho photometry is not available, so we give values converted from Johnson  $B$ ,  $V$  magnitudes using  $V_T = V_J + \frac{0.090}{0.850} (B_J - V_J)$ ,  $B_T = V_J + \frac{1.090}{0.850} (B_J - V_J)$ . This example table contains the first eight systems in each sample; the full table is available in the online version of the article – see Supporting Information.

| UNS ID | Primary name      | SpT                | Reference | $V_T$<br>(mag)    | $B_T$<br>(mag)    | Reference | $T_{\text{eff,G}}$<br>(K) | $T_{\text{eff,T}}$<br>(K) |
|--------|-------------------|--------------------|-----------|-------------------|-------------------|-----------|---------------------------|---------------------------|
| K001   | HD 22049          | K2 V (k)           | gray06    | $3.814 \pm 0.009$ | $4.846 \pm 0.014$ | TYC2      | 4999                      | 5005                      |
| K002   | HD 201091         | K5 V               | gray03    | $5.349 \pm 0.009$ | $6.711 \pm 0.014$ | TYC2      |                           | 4401                      |
| K003   | HD 209100         | K4 V (k)           | gray06    | $4.826 \pm 0.009$ | $6.048 \pm 0.014$ | TYC2      |                           | 4654                      |
| K004   | HD 202560         | K7.0               | haw96     | $6.845 \pm 0.011$ | $8.476 \pm 0.017$ | TYC2      |                           | 3915                      |
| K005   | HD 88230          | K5                 | haw95     | $6.751 \pm 0.010$ | $8.340 \pm 0.016$ | TYC2      |                           | 3990                      |
| K006   | HD 26965          | K0.5 V             | gray06    | $4.506 \pm 0.009$ | $5.440 \pm 0.014$ | TYC2      | 5124                      | 5199                      |
| K007   | HD 165341         | K0- V              | gray03    | $4.217 \pm 0.009$ | $5.180 \pm 0.014$ | TYC2      | 5019                      | 5140                      |
| K008   | HD 131977         | K4 V               | gray06    | $5.880 \pm 0.010$ | $7.163 \pm 0.016$ | TYC2      |                           | 4544                      |
|        |                   | ...                |           |                   |                   |           |                           |                           |
| G001   | HD 128620         | G2 V               | gray06    | $-0.065 \pm$      | $0.707 \pm$       | bes90     |                           | 5560                      |
| G002   | HD 10700          | G8.5 V             | gray06    | $3.572 \pm 0.009$ | $4.380 \pm 0.014$ | TYC2      | 5358                      | 5474                      |
| G003   | HD 185144         | G9 V               | gray03    | $4.757 \pm 0.009$ | $5.657 \pm 0.014$ | TYC2      | 5210                      | 5270                      |
| G004   | HD 4614           | G0V SB             | HIP       | $3.518 \pm 0.009$ | $4.142 \pm 0.014$ | TYC2      |                           | 5968                      |
| G005   | HD 20794          | G8 V               | gray06    | $4.336 \pm 0.009$ | $5.130 \pm 0.014$ | TYC2      | 5478                      | 5507                      |
| G006   | HD 131156         | G7 V               | gray03    | $4.757 \pm 0.009$ | $5.575 \pm 0.014$ | TYC2      | 5380                      | 5451                      |
| G007   | CCDM 12337+4121 A | G0 V               | gray03    | $4.309 \pm 0.009$ | $4.955 \pm 0.014$ | TYC2      | 5818                      | 5901                      |
| G008   | HD 115617         | G7 V               | gray06    | $4.810 \pm 0.009$ | $5.612 \pm 0.014$ | TYC2      | 5503                      | 5488                      |
|        |                   | ...                |           |                   |                   |           |                           |                           |
| F001   | HD 61421          | F5 IV-V            | gray03    | $0.414 \pm$       | $0.909 \pm$       | bes90     | 6629                      | 6421                      |
| F002   | HD 170153         | F7Vvar             | HIP       | $3.614 \pm 0.009$ | $4.150 \pm 0.014$ | TYC2      |                           | 6263                      |
| F003   | HD 30652          | F6V                | BSC5      | $3.222 \pm 0.009$ | $3.723 \pm 0.014$ | TYC2      |                           | 6395                      |
| F004   | HD 98231          | G0V                | BSC5      | $4.310 \pm 0.010$ | $4.910 \pm 0.010$ | TDSC      |                           | 6044                      |
| F005   | HD 1581           | F9.5 V             | gray06    | $4.286 \pm 0.009$ | $4.900 \pm 0.014$ | TYC2      | 5991                      | 6000                      |
| F006   | HD 38393          | F6.5 V             | gray06    | $3.638 \pm 0.009$ | $4.162 \pm 0.014$ | TYC2      | 6372                      | 6307                      |
| F007   | HD 203608         | F9 V Fe-1.4 CH-0.7 | gray06    | $4.276 \pm 0.009$ | $4.783 \pm 0.014$ | TYC2      | 6205                      | 6371                      |
| F008   | HD 19373          | F9.5 V             | gray03    | $4.107 \pm 0.009$ | $4.759 \pm 0.014$ | TYC2      | 5899                      | 5884                      |
|        |                   | ...                |           |                   |                   |           |                           |                           |
| A001   | HD 48915          | A0mA1 Va           | gray03    | $-1.430 \pm$      | $-1.430 \pm$      | bes90     | 9580                      | 9646                      |
| A002   | HD 187642         | A7 Vn              | gray03    | $0.955 \pm 0.010$ | $1.248 \pm 0.012$ | TYC       | 7800                      | 7383                      |
| A003   | HD 172167         | A0 Va              | gray03    | $0.029 \pm$       | $0.017 \pm$       | bes90     | 9519                      | 9765                      |
| A004   | HD 216956         | A4 V               | gray06    | $1.248 \pm 0.007$ | $1.407 \pm 0.009$ | TYC       | 8399                      | 8265                      |
| A005   | HD 102647         | A3 Va              | gray03    | $2.143 \pm 0.004$ | $2.300 \pm 0.003$ | TYC       | 8378                      | 8280                      |
| A006   | HD 60179          | A1.5 IV+           | gray03    | $1.944 \pm$       | $1.991 \pm$       | CNS3      |                           | 9194                      |
| A007   | HD 76644          | A7 V(n)            | gray03    | $3.128 \pm 0.009$ | $3.358 \pm 0.014$ | TYC2      | 7769                      | 7769                      |
| A008   | HD 159561         | A5III              | BSC5      | $2.106 \pm 0.003$ | $2.315 \pm 0.003$ | TYC       |                           | 7909                      |
|        |                   | ...                |           |                   |                   |           |                           |                           |

**Table 6.** M-type primary spectral types, effective temperatures and Johnson  $B$ ,  $V$  photometry: spectral type and reference;  $T_{\text{eff}}$  determined from spectral type; Johnson  $V$  magnitude and references; Johnson  $(B - V)$  colour and references. Where multiple references are given for the photometry, the value given here is the mean of the referenced values. This example table contains the first eight systems; the full table is available in the online version of the article – see Supporting Information.

| UNS ID | Name      | SpT  | SpT ref | $T_{\text{eff}}(\text{SpT})$<br>(K) | $V_J$<br>(mag) | $V_J$ ref   | $(B - V)_J$<br>(mag) | $(B - V)_J$ ref |
|--------|-----------|------|---------|-------------------------------------|----------------|-------------|----------------------|-----------------|
| M001   | HIP 87937 | M4   | haw95   | 3100                                | 9.55           | wei96,bes90 | 1.75                 | wei96,bes90     |
| M002   | GJ 406    | M5.5 | haw95   | 2700                                | 13.48          | wei96,bes90 | 2.00                 | wei96,bes90     |
| M003   | HD 95735  | M2   | haw95   | 3400                                | 7.50           | egg74       | 1.51                 | egg74           |
| M004   | GJ 65 A   | M5.5 | haw95   | 2700                                | 12.57          | CNS3        | 1.85                 | CNS3            |
| M005   | HIP 92403 | M3.5 | haw95   | 3175                                | 10.43          | wei96,bes90 | 1.75                 | wei96,bes90     |
| M006   | GJ 905    | M5   | haw95   | 2800                                | 12.29          | wei96       | 1.91                 | wei96           |
| M007   | HD 217987 | M0.5 | haw96   | 3700                                | 7.37           | egg74       | 1.48                 | egg74           |
| M008   | HIP 57548 | M4   | haw95   | 3100                                | 11.14          | wei96,bes90 | 1.76                 | wei96,bes90     |
|        |           | ...  |         |                                     |                |             |                      |                 |

**Table 7.** Component cross-identifications with common catalogues: system ID, CCDM ID and component, Henry Draper (HD/HDE) ID, Gleise & Jahreiss (CNS3) ID, Luyten Half Second ID, New Luyten Two Tenths ID (record number in original NLTT), Harvard Revised (BSC5) ID, Positions and Proper Motions ID, *Hipparcos* ID, Tycho ID, Tycho Double Star Catalogue ID and component, Bonner Durchmusterung ID, Cordoba Durchmusterung ID, Cape Photographic Durchmusterung ID, Yale Parallax Catalogue (PLX) ID, 2MASS Point-Source Catalogue ID (these are determined by simple cone search and may not be reliable in some cases). This example table contains the first six systems in each sample; the full table is available in the online version of the article – see Supporting Information.

| UNS  | CCDM         | HD     | GJ     | LHS   | NLTT  | HR   | PPM    | HIP    | TYC         | TDSC    | BD        | CoD       | CPD | PLX     | 2MASS            |
|------|--------------|--------|--------|-------|-------|------|--------|--------|-------------|---------|-----------|-----------|-----|---------|------------------|
| M001 |              |        | 699    | 57    | 45718 |      |        | 87937  | 425-2502-1  |         | +04 3561a |           |     | 4098.00 | 17574849+0441405 |
| M002 |              |        | 406    | 36    |       |      |        |        |             |         |           |           |     | 2553.00 | 10562886+0700527 |
| M003 | 11033+3558 A | 95735  | 411    | 37    | 26105 |      | 75640  | 54035  | 2521-2279-1 |         | +36 2147  |           |     | 2576.00 | 11032027+3558203 |
| M004 |              |        | 65 A   | 9     | 5504  |      |        |        |             |         |           |           |     | 343.10  | 01390120-1757026 |
| M004 |              |        | 65 B   | 10    | 5505  |      |        |        |             |         |           |           |     | 343.10  | 01390120-1757026 |
| M005 |              |        | 729    | 3414  | 47045 |      | 734465 | 92403  | 6859-1332-1 |         |           | -23 14742 |     | 4338.00 | 18494929-2350101 |
| M006 |              |        | 905    | 549   | 57692 |      |        |        | ...         |         |           |           |     | 5736.00 | 23415498+4410407 |
| K001 | 03329-0927 A | 22049  | 144    | 1557  | 11207 | 1084 | 185905 | 16537  | 5296-1533-1 | 7579 A  | -09 697   |           |     | 742.00  | 03325591-0927298 |
| K002 | 21069+3844 A | 201091 | 820 A  | 62    | 50559 | 8085 | 86045  | 104214 | 3168-2800-1 | 57584 A | +38 4343  |           |     | 5077.00 | 21065341+3844529 |
| K002 | 21069+3844 B | 201092 | 820 B  | 63    | 50560 | 8086 | 86049  | 104217 | 3168-2798-1 | 57584 B | +38 4344  |           |     | 5077.00 | 21065473+3844265 |
| K003 |              | 209100 | 845    | 67    | 52724 | 8387 | 349918 | 108870 | 8817-984-1  |         |           |           |     | 5314.00 | 22032156-5647093 |
| K003 |              | 202560 | 825    | 66    | 50917 |      | 301208 | 105090 | 7966-1201-1 |         |           |           |     | 5117.00 | 22041052-5646577 |
| K005 | 10114+4927 A | 88230  | 380    | 280   | 23613 |      | 51736  | 49908  | 3437-811-1  | 28452 A | +50 1725  |           |     | 2390.00 | 21171534-3852022 |
| K006 | 04153-0739 A | 26965  | 166 A  | 23    | 12863 | 1325 | 400061 | 19849  | 5312-2325-1 | 8980 A  | -07 780   |           |     | 945.00  | 04151651-0739068 |
| K006 | 04153-0739 B | 26976  | 166 B  | 24    | 12868 |      |        |        |             |         | -07 781   |           |     | 945.00  | 04152173-0739173 |
| K006 | 04153-0739 C |        | 166 C  | 25    | 12869 |      |        |        | ...         |         |           |           |     | 945.00  | 04152173-0739173 |
| G001 | 14396-6050 A | 128620 | 559 A  | 50    | 37984 | 5459 | 360911 | 71683  | 9007-5849-1 | 38060 A |           |           |     | 3309.00 |                  |
| G001 | 14396-6050 B | 128621 | 559 B  | 51    | 37985 | 5460 |        | 71681  | 9007-5848-1 | 38060 B |           |           |     | 3309.00 |                  |
| G001 | 14396-6050 C |        | 551    | 49    | 37460 |      |        | 70890  |             |         |           |           |     | 3278.00 | 14294291-6240465 |
| G002 | 01441-1557 A | 10700  | 71     | 146   | 5787  | 509  | 210580 | 8102   | 5855-2292-1 | 3967 A  | -16 295   |           |     | 365.00  | 01440402-1556141 |
| G003 | 19322+6941 A | 185144 | 764    | 477   | 47961 | 7462 | 21580  | 96100  | 4448-2481-1 | 51348 A | +69 1053  |           |     | 4607.00 | 19322153+6939413 |
| G004 | 00491+5749 A | 4614   | 34 A   | 123   | 2690  | 219  | 25718  | 3821   | 3663-2669-1 | 1998 A  | +57 150   |           |     | 155.00  | 00490622+5748545 |
| G004 | 00491+5749 B |        | 34 B   | 122   |       |      |        | 3821   | 3663-2669-2 | 1998 B  |           |           |     | 155.00  | 00490516+5749037 |
| G005 |              | 20794  | 139    | 19    | 10637 | 1008 | 307533 | 15510  | 7567-1183-1 |         |           |           |     | 703.00  | 03195563-4304112 |
| G006 | 14513+1906 A | 131156 | 566 A  |       |       | 5544 | 130930 | 72659  | 1481-722-1  | 38468 A | +19 2870  |           |     | 3360.00 | 14512328+1906034 |
| G006 | 14513+1906 B |        | 566 B  |       |       |      |        | 72659  | 1481-722-2  | 38468 B |           |           |     | 3360.00 | 14512328+1906034 |
| F001 | 07393+0514 A | 61421  | 280 A  | 233   | 18229 | 2943 | 153068 | 37279  | 187-2184-1  | 20391 A | +05 1739  |           |     | 1805.00 | 07391805+0513298 |
| F001 | 07393+0514 B |        | 280 B  | 233   | 18229 |      | 153068 | 37279  | 187-2184-1  | 20391 A |           |           |     | 1805.00 | 07391805+0513298 |
| F002 | 18211+7245 A | 170153 | 713 AB | 3379  | 46426 | 6927 | 9830   | 89937  | 4437-1491-1 | 47207 A | +72 839   |           |     | 4245.00 | 18210342+7243582 |
| F003 | 04499+0657 A | 30652  | 178    | 14011 | 14011 | 1543 | 148020 | 22449  | 96-1462-1   | 10147 A | +06 762   |           |     | 1077.00 | 04495040+0657409 |
| F004 | 11182+3132 A | 98231  | 423 A  | 2390  | 26920 | 4375 | 400161 | 55203  | 2520-2634-1 | 31184 A | +32 2132  |           |     | 2625.00 | 11181100+3131464 |
| F004 | 11182+3132 B | 98230  | 423 B  | 2391  | 26921 | 4374 | 400161 | 55203  | 2520-2634-2 | 31184 B |           |           |     | 2625.00 | 11181100+3131464 |
| F005 |              | 1581   | 17     | 5     | 1045  | 77   | 351761 | 1599   | 8843-1706-1 |         |           |           |     | 54.00   | 02000446-6452282 |
| F006 | 05445-2226 A | 38393  | 216 A  |       | 15560 | 1983 | 249307 | 27072  | 5930-2197-1 | 12638 A | -22 1211  |           |     | 1316.00 | 05442780-2226538 |
| F006 | 05445-2226 B | 38392  | 216 B  |       | 15558 | 1982 | 249306 |        | 5930-2196-1 | 12638 B | -22 1210  |           |     | 1316.00 | 05442655-2225184 |
| A001 | 06451-1643 A | 48915  | 244 A  | 219   | 16953 | 2491 | 217626 | 32349  | 5949-2777-1 | 16356 A | -16 1591  |           |     | 1577.00 | 06450887-1642566 |
| A001 | 06451-1643 B |        | 244 B  | 219   | 16953 |      | 217626 | 32349  | 5949-2777-1 | 16356 A |           |           |     | 1577.00 | 06450887-1642566 |
| A002 | 19508+0852 A | 187642 | 768    | 3490  | 48314 | 7557 | 168779 | 97649  | 1058-3399-1 | 52618 A | +08 4236  |           |     | 4665.00 | 19504698+0852060 |
| A003 | 18369+3847 A | 172167 | 721    |       | 46746 | 7001 | 81558  | 91262  | 3105-2070-1 | 48054 A | +38 3238  |           |     | 4293.00 | 18365633+3847012 |
| A004 |              | 216956 | 881    |       | 55380 | 8728 | 274426 | 113368 | 6977-1267-1 |         |           |           |     | 5565.00 | 22573901-2937193 |
| A005 | 11490+1433 A | 102647 | 448    | 2462  | 28642 | 4534 | 128576 | 57632  | 870-988-1   | 32248 A | +15 2383  |           |     | 2738.00 | 11490366+1434197 |
| A006 | 07346+3153 A | 60179  | 278 A  |       | 18087 | 2891 | 72938  | 36850  | 2457-2407-1 | 20046 A | +32 1581  |           |     | 1785.00 | 07343598+3153184 |
| A006 | 07346+3153 B | 60178  | 278 B  |       | 18087 | 2890 | 72938  | 36850  | 2457-2407-2 | 20046 B | +32 1581  |           |     | 1785.00 | 07343598+3153184 |
| A006 | 07346+3153 C |        | 278 C  |       | 18088 |      | 72940  |        | 2453-1918-1 | 20046 C | +32 1582  |           |     | 1785.00 | 07343745+3152102 |

**Table 8.** Notes for specific systems. The full table is available in the online version of the article – see Supporting Information.

| UNS ID | Note                                                                                                                                                                                                                                                                                                                                                                                                                                                                                                                                                      |
|--------|-----------------------------------------------------------------------------------------------------------------------------------------------------------------------------------------------------------------------------------------------------------------------------------------------------------------------------------------------------------------------------------------------------------------------------------------------------------------------------------------------------------------------------------------------------------|
| M009   | Triple system. A,C components are very close binary, B component orbits AC (Delfosse et al. 1999)                                                                                                                                                                                                                                                                                                                                                                                                                                                         |
| M011   | CCDM lists a third component (CCDM 00184+4401 C), but this is not associated, CCDM 00184+4401 C is TYC 2794-1389-1                                                                                                                                                                                                                                                                                                                                                                                                                                        |
| M018   | CCDM lists seven other components (CCDM 22281+5741 C,D,E,F,G,H,I), but these are not associated, CCDM 22281+5741 C is TYC 3991-30-1, CCDM 22281+5741 D is clearly visible in 2MASS images (22 28 10.42 +57 42 44.9), but is not in the PSC, CCDM 22281+5741 E is 2MASS 22281788+5742148, CCDM 22281+5741 F is 2MASS 22280456+5742284, identification of CCDM 22281+5741 G,H uncertain, CCDM 22281+5741 I is HD 213209                                                                                                                                     |
| M024   | CCDM lists a secondary (CCDM 17366+6822 A, HD 160861), but this is not associated<br>...                                                                                                                                                                                                                                                                                                                                                                                                                                                                  |
| K001   | $\epsilon$ Eridani is not included in DEBRIS, as it is being observed by a Guaranteed Time project                                                                                                                                                                                                                                                                                                                                                                                                                                                        |
| K002   | PPM 86047 = FK5 793 is not a component but is the system photocentre, CCDM lists four other components (CCDM 21069+3844 C,D,E,P), but these are not associated, CCDM 21069+3844 C is BD +38 4345, CCDM 21069+3844 D is BD +38 4342, CCDM 21069+3844 E is BD +38 4349, CCDM 21069+3844 P is TYC 3168-1076-1                                                                                                                                                                                                                                                |
| K003   | $\epsilon$ Indi B is a brown dwarf binary                                                                                                                                                                                                                                                                                                                                                                                                                                                                                                                 |
| K005   | CCDM lists two other components (CCDM 10114+4927 B,C), but these are not associated, CCDM 10114+4927 B is HD 233714, CCDM 10114+4927 C is HD 233713                                                                                                                                                                                                                                                                                                                                                                                                       |
| K006   | CCDM lists two other components (CCDM 04153-0739 D,E), but these are not associated, CCDM 04153-0739 D is TYC 5313-183-1, CCDM 04153-0739 E is 2MASS 04153228-0730274<br>...                                                                                                                                                                                                                                                                                                                                                                              |
| G001   | Proxima distance: $1.301 \pm 0.001$ pc (YPC,HIPnr,ben99)                                                                                                                                                                                                                                                                                                                                                                                                                                                                                                  |
| G002   | $\tau$ Ceti is not included in DEBRIS, as it is being observed by a Guaranteed Time project<br>CCDM lists a secondary (CCDM 01441-1557 B), but this is not associated, CCDM 01441-1557 B is 2MASS 01440770-1558204                                                                                                                                                                                                                                                                                                                                        |
| G003   | CCDM lists a secondary (CCDM 19322+6941 B), but this is not associated, CCDM 19322+6941 B is TYC 4448-2117-1                                                                                                                                                                                                                                                                                                                                                                                                                                              |
| G004   | CCDM lists six other components (CCDM 00491+5749 C,D,E,F,G,H), but these are not associated, CCDM 00491+5749 C is 2MASS 00483853+5748135, CCDM 00491+5749 D is 2MASS 00490544+5751559, CCDM 00491+5749 E is BD +57 155, CCDM 00491+5749 F is TYC 3663-1484-1, CCDM 00491+5749 G is BD +56 129, CCDM 00491+5749 H is HD 236533                                                                                                                                                                                                                             |
| G006   | CCDM lists two other components (CCDM 14513+1906 C,D), but these are not associated, CCDM 14513+1906 C is 2MASS 14512179+1907087, CCDM 14513+1906 D is 2MASS 14511264+1906463, TYC proper motion is likely inaccurate<br>...                                                                                                                                                                                                                                                                                                                              |
| F001   | Procyon has DA white dwarf secondary (GJ 280 B), CCDM 07393+0514 C,D,E are not associated, CCDM 07393+0514 C is 2MASS 07392181+0516077, CCDM 07393+0514 D is not in 2MASS PSC, but has three entries in 2MASS Survey Point Source Reject Table, CCDM 07393+0514 E is TYC 187-804-1                                                                                                                                                                                                                                                                        |
| F002   | Spectroscopic binary (SBC9 1058).<br>CCDM lists two wide secondaries (CCDM 18211+7245 B,C), but these are not associated, CCDM 18211+7245 B is TYC 4437-465-1, CCDM 18211+7245 C is 2MASS 18210058+7246592,                                                                                                                                                                                                                                                                                                                                               |
| F003   | CCDM lists a secondary (CCDM 04499+0657 B), but this is not associated<br>CCDM 04499+0657 B is TYC 96-137-1                                                                                                                                                                                                                                                                                                                                                                                                                                               |
| F006   | CCDM lists a third component (CCDM 05445-2226 C) but this is not associated<br>CCDM 05445-2226 C is CPD -22 883, 2MASS 05442769-2223272, $\rho$ , $\theta$ in CCDM are suspect<br>...                                                                                                                                                                                                                                                                                                                                                                     |
| A001   | CCDM and WDS list a third component (CCDM 06451-1643 C) orbiting Sirius B, but this is not well confirmed, and is not included here. CCDM lists a wide secondary (CCDM 06451-1643 D), but this is not associated, CCDM 06451-1643 D is visible in 2MASS images (06 45 11.72 -16 41 48.7) but is not in the PSC                                                                                                                                                                                                                                            |
| A002   | Altair is included in DEBRIS despite just missing confusion cut ( $1.24$ versus $1.20$ mJy beam $^{-1}$ ), CCDM lists two other components (CCDM 19508+0852 B,C), but these are not associated, CCDM 19508+0852 B is 2MASS 19503473+0853019, CCDM 19508+0852 C is 2MASS 19505953+0851129 ( $\rho$ in CCDM is slightly too large)                                                                                                                                                                                                                          |
| A003   | Vega is not included in DEBRIS, as it is being observed by a Guaranteed Time project, CCDM lists four other components (CCDM 18369+3847 B,C,D,E), but these are not associated, CCDM 18369+3847 B is PPM 81557 and is visible in 2MASS images, but is flagged as a persistence artefact, CCDM 18369+3847 C is clearly visible in 2MASS images (18 36 50.24 +38 46 44.6), but is not in the PSC, CCDM 18369+3847 D is clearly visible in 2MASS images (18 36 51.52 +38 47 10.7), but is not in the PSC, CCDM 18369+3847 E is 2MASS 18370125+3848126<br>... |

The choice of name for components is generally in the order of preference: HD, HIP, GJ, LHS, NLTT, TYC, PPM, CCDM, other catalogue name, 2MASS. For systems with multiple stars, the first identifier in that order which uniquely identifies the component is used. Where components are not resolved in any catalogues we have used, we just give a single entry.

Table 3 lists system properties, including the name of the primary star, our adopted distance and whether the system is included in the SUNS and DEBRIS surveys.

Table 4 lists the components of systems which are resolved in at least one of the catalogues that we have used, and gives positions and proper motions, as well as approximate separation from the primary where this is larger than 1 arcsec. Where two references are listed for a component, the proper motion has been copied from another component in the system, and in several cases the position is computed using a relative position from the CCDM combined with the position of another component.

Tables 5 and 6 list the properties of primary stars in systems, which were used for selection in spectral type and luminosity (spectral type, photometry), and/or in the plots in this paper (photometry, effective temperatures). Table 5 contains the A–K-type primaries with Tycho photometry, and effective temperatures from Gray et al. (2003, 2006) and computed from  $(B_T - V_T)$ . For the few very bright stars where Tycho photometry is saturated, we give values converted from Johnson  $B$ ,  $V$  photometry. Table 6 contains the M-type primaries with spectral types, Johnson  $B$ ,  $V$  photometry and effective temperatures computed from the spectral type.

Table 7 gives cross-identifications for system components in several common catalogues, and Table 8 gives comments on various specific systems. Table 8 includes notes for systems where there are unresolved components, or there are components listed in catalogues which we do not consider physically associated with the system.

## ACKNOWLEDGMENTS

This research has made use of the SIMBAD and VizieR databases, operated at CDS, Strasbourg, France. We have made extensive use of the open source MySQL relational database management system. The authors wish to thank Todd Henry for providing unpublished RECONS parallaxes, which helped to refine our selection of M-type systems.

## REFERENCES

- Audley M. D. et al., 2004, *Proc. SPIE*, 5498, 63  
 Bakos G.Á, Sahu K. C., Németh P., 2002, *ApJS*, 141, 187  
 Beichman C. A. et al., 2006, *ApJ*, 652, 1674  
 Benedict G. F. et al., 1999, *AJ*, 118, 1086  
 Bessel M. S., 1990, *AJ*, 112, 2300  
 Costa E., Méndez R. A., Jao W.-C., Henry T. J., Subasavage J. P., Brown M. A., Ianna P. A., Bartlett J. L., 2005, *AJ*, 130, 337  
 Cutri R. M. et al., 2003, 2MASS All Sky Catalog of point sources, NASA/IPAC Infrared Science Archive  
 Deacon N. R., Hambly N. C., Cooke J. A., 2005, *A&A*, 435, 363  
 Delfosse X., Forveille T., Udry S., Beuzit J.-L., Mayor M., Perrier C., 1999, *A&A*, 350, L39  
 Dommanget J., Nys O., 2002, *CDS Catalogue I/274*  
 Dotter A., Chaboyer B., Jevremović D., Kostov V., Baron E., Ferguson J. W., 2008, *ApJS*, 178, 89  
 Ducourant C., Dauphole B., Rapaport M., Colin J., Geffert M., 1998, *A&A*, 333, 882  
 Eggen O. J., 1974, *PASP*, 86, 697  
 Eggen O. J., 1979, *ApJS*, 39, 89  
 Eggen O. J., 1980, *ApJS*, 43, 457  
 Fabricius C., Makarov V. V., 2000, *A&AS*, 144, 45  
 Fabricius C., Høg E., Makarov V. V., Mason B. D., Wycof G. L., Urban S. E., 2002, *A&A*, 384, 180  
 Falin J. L., Mignard F., 1999, *A&AS*, 135, 231  
 Finch C. T., Henry T. J., Subasavage J. P., Jao W.-C., Hambly N. C., 2007, *AJ*, 133, 2898  
 Gliese W., Jahreiss H., 1991, *CDS Catalogue V/70A*  
 Gould A., Chanamé J. A., 2004, *ApJS*, 152, 103  
 Gray R. O., Napier M. G., Winkler L. I., 2001a, *AJ*, 121, 2148  
 Gray R. O., Graham P. W., Hoyt S. R., 2001b, *AJ*, 121, 2159  
 Gray R. O., Corbally C. J., Garrison R. F., McFadden M. T., Robinson P. E., 2003, *AJ*, 126, 2048  
 Gray R. O., Corbally C. J., Garrison R. F., McFadden M. T., Bubar E. J., McGahee C. E., O'Donoghue A. A., Knox E. R., 2006, *AJ*, 132, 161  
 Griffin M. et al., 2008, *Proc. SPIE*, 7010, 701006  
 Hawley S. L., Gizis J. E., Reid I. N., 1996, *AJ*, 112, 1799  
 Heintz W. D., 1980, *ApJS*, 44, 111  
 Heintz W. D., 1990, *ApJS*, 74, 275  
 Henry T. J., Kirkpatrick J. D., Simons D. A., 1994, *AJ*, 108, 1437  
 Henry T. J., Jao W.-C., Subasavage J. P., Beaulieu T. D., Ianna P. A., Costa E., 2006, *AJ*, 132, 2360  
 Hershey J. L., Taff L. G., 1998, *AJ*, 116, 1440  
 Hoffleit D., Warren W. H. Jr, 1991, *CDS Catalogue V/50*  
 Høg E. et al., 1997, *A&A*, 323, L57  
 Høg E., Kuzmin A., Bastian U., Fabricius C., Kuimov K., Lindegren L., Makarov V. V., Roeser S., 1998, *A&A*, 335, L65  
 Høg E. et al., 2000, *A&A*, 355, L27  
 Holland W. S., Duncan W. D., Kelly B. D., Irwin K. D., Walton A. J., Ade P. A. R., Robson E. I. et al., 2003, *Proc. SPIE*, 4855, 1  
 Houk N., 1978, Michigan Catalogue of Two-dimensional Spectral Types for the HD Stars Vol. 2, Declinations  $-53^{\circ}0$  to  $-40^{\circ}0$ . Department of Astronomy, University of Michigan, Ann Arbor, MI, USA  
 Houk N., 1982, Michigan Catalogue of Two-dimensional Spectral Types for the HD Stars Vol. 3, Declinations  $-40^{\circ}0$  to  $-26^{\circ}0$ . Department of Astronomy, University of Michigan, Ann Arbor, MI, USA  
 Houk N., Cowley A. P., 1975, Michigan Catalogue of Two-dimensional Spectral Types for the HD stars Vol. 1, Declinations  $-90^{\circ}0$  to  $-53^{\circ}0$ . Department of Astronomy, University of Michigan, Ann Arbor, MI, USA  
 Houk N., Smith-Moore M., 1988, Michigan Catalogue of Two-dimensional Spectral Types for the HD Stars Vol. 4, Declinations  $-26^{\circ}0$  to  $-12^{\circ}0$ . Department of Astronomy, University of Michigan, Ann Arbor, MI, USA  
 Houk N., Swift C., 1999, Michigan Catalogue of Two-dimensional Spectral Types for the HD Stars Vol. 4, Declinations  $-12^{\circ}0$  to  $+05^{\circ}0$ . Department of Astronomy, University of Michigan, Ann Arbor, MI, USA  
 Jao W.-C., Henry T. J., Subasavage J. P., Brown M. A., Ianna P. A., Bartlett J. L., Costa E., Méndez R. A., 2005, *AJ*, 129, 1954  
 Kirkpatrick J. D., Henry T. J., McCarthy D. W., Jr, 1991, *AJ*, 77, 417  
 Legget S. K., 1992, *ApJS*, 82, 351  
 Leinert C., Allard F., Richichi A., Hauschildt P. H., 2000, *A&A*, 353, 691  
 Matthews B. C. et al., 2007, *PASP*, 119, 842  
 McAlister H. A., Hartkopf W. I., Hutter D. J., Franz O. G., 1987, *AJ*, 93, 688  
 Perryman M. A. C. et al., 1997, *A&A*, 323, L49  
 Pilbratt G., 2008, *Proc. SPIE*, 7010, 701002  
 Poglitsch A. et al., 2008, *Proc. SPIE*, 7010, 701005  
 Ramírez I., Meléndez J., 2005, *ApJ*, 626, 465  
 Reid I. N., Hawley S. L., 2005, *New Light on Dark Stars*. Springer-Praxis Books, New York  
 Reid I. N., Hawley S. L., Gizis J. E., 1995, *AJ*, 110, 1838  
 Rhee J. H., Song I., Zuckerman B., McElwain M., 2007, *ApJ*, 660, 1556  
 Rodgers A. W., Eggen O. J., 1974, *PASP*, 86, 742  
 Röser S., Bastian U., 1991, PPM Star Catalogue North. Spektrum Akademischer Verlag, Heidelberg, Germany

- Röser S., Bastian U., 1993, PPM Star Catalogue South. Spektrum Akademischer Verlag, Heidelberg, Germany
- Röser S., Bastian U., Kuzmin A., 1994, A&AS, 105, 301
- Salim S., Gould A., 2003, ApJ, 582, 1011
- Söderhjelm S., 1999, A&A, 341, 121
- Su K. Y. L. et al., 2006, ApJ, 653, 675
- Subasavage J. P., Henry T. J., Hambly N. C., Brown M. A., Jao W.-C., 2005a, AJ, 129, 413
- Subasavage J. P., Henry T. J., Hambly N. C., Brown M. A., Jao W.-C., Finch C. T., 2005b, AJ, 130, 1658
- Trilling D. E. et al., 2008, ApJ, 674, 1086
- van Altena W. F. Lee J. T., Hoffleit E. D., 1995, General Catalogue of Trigonometric Stellar Parallaxes, 4th edn. Yale University Observatory, New Haven, CT
- van Leeuwen F., 2007, *Hipparcos*, the New Reduction of the Raw Data. Springer/Astrophysics and Space Science Library
- Mason B. D., Wycoff G. L., Hartkopf W. I., Douglass G. G., Worley C. E., 2009, The Washington Visual Double Star Catalog, VizieR On-line Data Catalog
- Weis E. W., 1991, AJ, 102, 1795
- Weis E. W., 1996, AJ, 112, 2300
- Weis E. W., Lee J. T., Lee A. H., Greise J. W. III, Vincent J. M., Upgren A. R., 1999, AJ, 117, 1037

## SUPPORTING INFORMATION

Additional Supporting Information may be found in the online version of this article:

**Table 3.** System information.

**Table 4.** Component names, positions and proper motions.

**Table 5.** A–K primary spectral types, Tycho photometry and effective temperatures.

**Table 6.** M-type primary spectral types, effective temperatures and Johnson *B*, *V* photometry.

**Table 7.** Component cross-identifications with common catalogues.

**Table 8.** Notes for specific systems.

Please note: Wiley-Blackwell are not responsible for the content or functionality of any supporting materials supplied by the authors. Any queries (other than missing material) should be directed to the corresponding author for the article.

This paper has been typeset from a  $\text{\TeX}/\text{\LaTeX}$  file prepared by the author.
